# Supplementary material for: Preparation, crystal structure, and magnetic properties of a copper hydroxy salt with diamond chain magnetic network
Source: Royal Society of Chemistry journal article supplement (doi:10.1039/c4ce01642d), 2014-01-01
Supplement: c4ce01642d2.pdf [file c4ce01642d2.pdf]

## Supporting Information

### Preparation, Crystal Structure, and Magnetic Properties of Copper Hydroxy Salt with Diamond Chain Magnetic Network

Shota Yoneyama,<sup>a</sup> Takeshi Kodama,<sup>a</sup> Koichi Kikuchi,<sup>a</sup> Yutaka Fujii,<sup>b</sup> Hikomitsu Kikuchi,<sup>b</sup> and Wataru Fujita<sup>\*c</sup>

<sup>a</sup>Department of Chemistry, Tokyo Metropolitan University, Minami-osawa 1-1, Hachioji, Tokyo 192-0397, Japan.

<sup>b</sup>Department of Applied Physics, University of Fukui, Bunkyo 3-9-1, Fukui 910-8507, Japan.

<sup>c</sup>Department of Informatics and Biological Sciences, Nagoya City University, Yamanohata 1, Mizuho-cho, Mizuho-ku, Nagoya 467-8501, Japan.

E-mail: [fujitaw@nsc.nagoya-cu.ac.jp](mailto:fujitaw@nsc.nagoya-cu.ac.jp)

|                                                     |     |
|-----------------------------------------------------|-----|
| 1. Crystal Structure Analyses                       | S2  |
| 2. Powder X-ray Diffraction Patterns                | S8  |
| 3. Magnetic Properties                              | S11 |
| 4. Hamiltonian of a Distorted Diamond Chain Lattice | S12 |
| 5. References                                       | S13 |

## 1. X-ray Measurements and Analyses of **1** and its Polymorph $\beta$ .

X-ray diffraction data were collected with graphite-monochromated Mo-K $\alpha$  ( $\lambda = 0.71073$  Å) radiation on a RIGAKU Mercury CCD diffractometer. Temperature control was carried out using Digital X-ray Cryo System XR-CS190D (Japan Thermal Engineering Co. Ltd.). All structures were solved by a direct method using the SHELXS-90 program<sup>1</sup> and refined by successive differential Fourier syntheses and a full-matrix least-squares procedure using the SHELXL-97 program.<sup>2</sup> Anisotropic thermal factors were applied to all non-hydrogen atoms. This data can be obtained free of charge via [www.ccdc.cam.ac.uk/data\\_request/cif](http://www.ccdc.cam.ac.uk/data_request/cif), or by e-mailing [data\\_request@ccdc.cam.ac.uk](mailto:data_request@ccdc.cam.ac.uk), or by contacting The Cambridge Crystallographic Data Centre, 12, Union Road, Cambridge CB2 1EZ, UK; fax: +44 1223 336033.

Table S1. Crystal structural parameters of **1** and its polymorph  $\beta$  at 250 K.

|                                                 | <b>1</b>                                                                       | $\beta$                                                                        |
|-------------------------------------------------|--------------------------------------------------------------------------------|--------------------------------------------------------------------------------|
| CCDC ID code                                    | 1015729                                                                        | 1026061                                                                        |
| Empirical formula                               | C <sub>16</sub> H <sub>26</sub> Cu <sub>3</sub> O <sub>16</sub> S <sub>4</sub> | C <sub>16</sub> H <sub>26</sub> Cu <sub>3</sub> O <sub>16</sub> S <sub>4</sub> |
| Formula weight                                  | 793.25                                                                         | 793.25                                                                         |
| Color                                           | light blue                                                                     | light blue                                                                     |
| Crystal system                                  | triclinic                                                                      | triclinic                                                                      |
| Space group                                     | <i>P</i> -1                                                                    | <i>P</i> -1                                                                    |
| <i>a</i> (Å)                                    | 5.712(4)                                                                       | 9.523(5)                                                                       |
| <i>b</i> (Å)                                    | 8.741(6)                                                                       | 14.450(6)                                                                      |
| <i>c</i> (Å)                                    | 27.100(16)                                                                     | 20.410(9)                                                                      |
| $\alpha$ (deg)                                  | 97.596(9)                                                                      | 71.148(14)                                                                     |
| $\beta$ (deg)                                   | 91.516(6)                                                                      | 79.669(17)                                                                     |
| $\gamma$ (deg)                                  | 100.966(10)                                                                    | 76.292(15)                                                                     |
| <i>V</i> (Å <sup>3</sup> )                      | 1314.8(15)                                                                     | 2566(2)                                                                        |
| <i>Z</i>                                        | 2                                                                              | 4                                                                              |
| <i>D</i> <sub>calcd</sub> (g cm <sup>-3</sup> ) | 1.842                                                                          | 1.861                                                                          |
| Reflections collected                           | 4439                                                                           | 8741                                                                           |
| Goodness-of fit on <i>F</i> <sup>2</sup>        | 1.041                                                                          | 1.032                                                                          |
| <i>R</i> 1, <i>wR</i> 2 (all data)              | 0.0479, 0.1330                                                                 | 0.0625, 0.1830                                                                 |

(a)

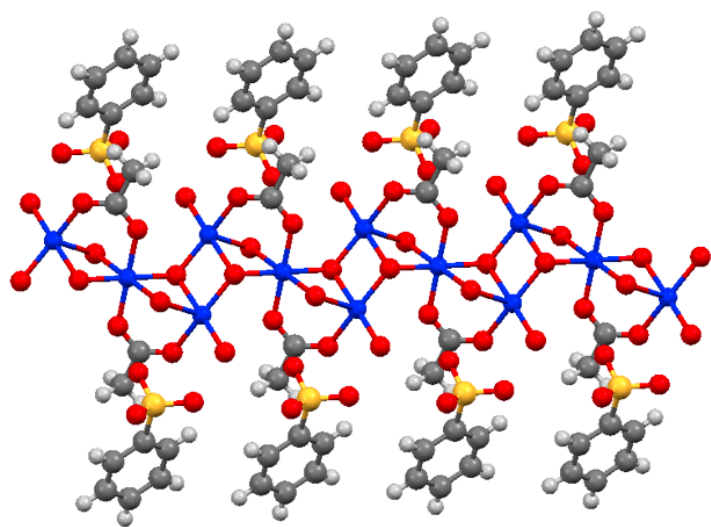

(b)

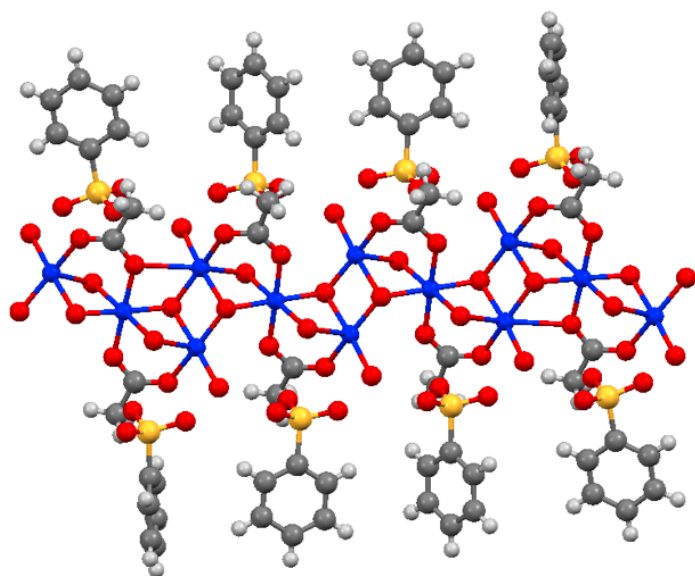

Figure S1. Structural comparison of **1** with its polymorph  $\beta$ . Atomic alignment of (a) **1** and (b) the  $\beta$  phase. Hydrogen, light grey; carbon, dark grey; oxygen, red; copper, blue; sulfur, yellow. The polymorph  $\beta$  has also a distorted diamond chain magnetic network.

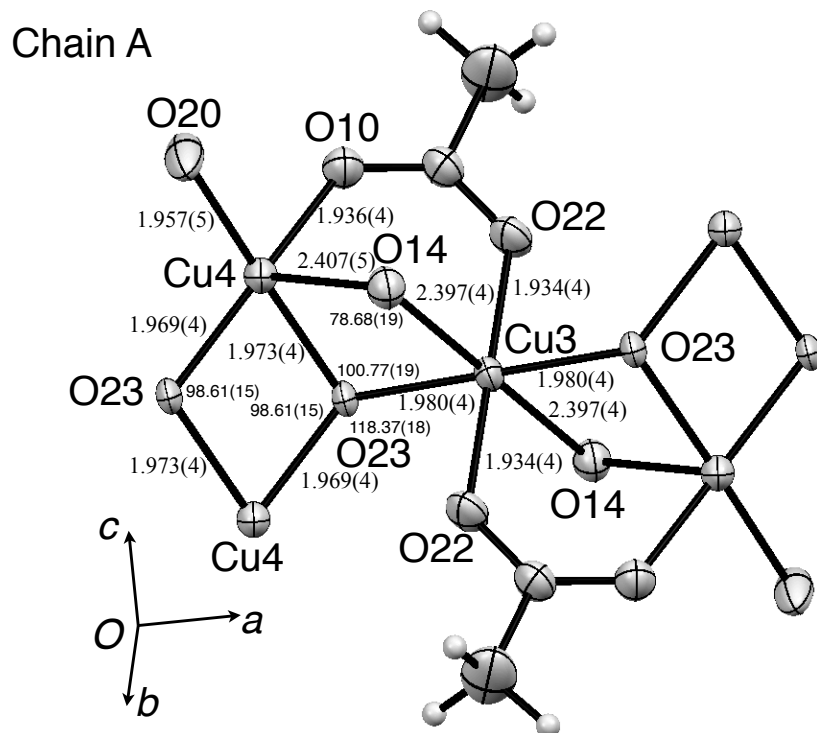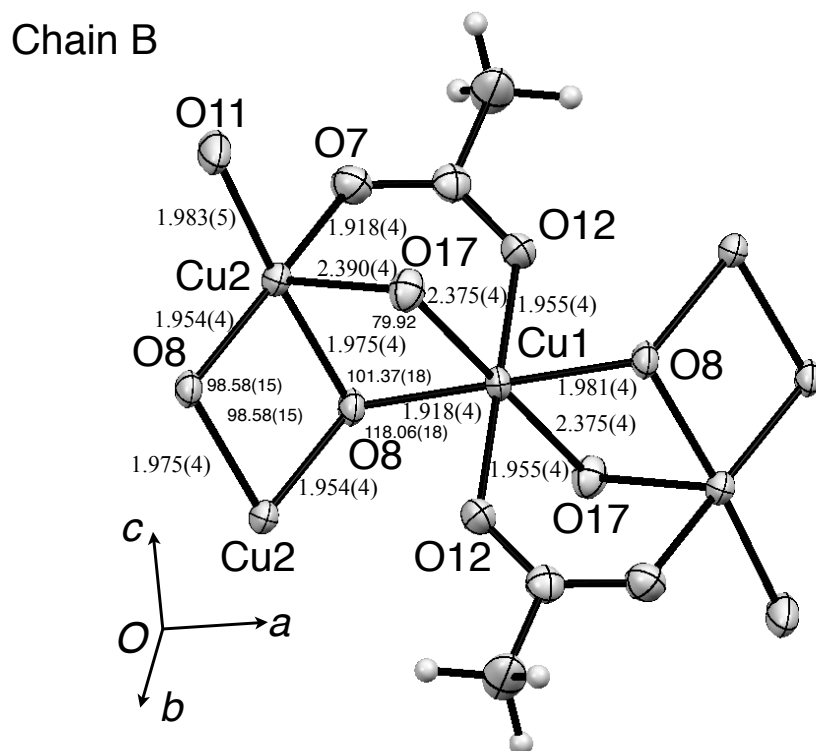

Figure S2. Local structures, main interatomic distances and bond angles in the copper hydroxide chain units A and B in **1**. Interatomic distances and bridging angles were described in Times New Roman and Helvetica, respectively.

Table S2. Interatomic distances (Å) of the copper hydroxide chain units A and B in **1**.

| atom | atom | distance | atom | atom | distance |
|------|------|----------|------|------|----------|
| Cu1  | O8   | 1.981(4) | Cu3  | O22  | 1.934(4) |
| Cu1  | O12  | 1.955(4) | Cu3  | O23  | 1.980(4) |
| Cu1  | O17  | 2.375(4) | Cu3  | O14  | 2.397(4) |
| Cu2  | O7   | 1.918(4) | Cu4  | O10  | 1.936(4) |
| Cu2  | O8   | 1.975(4) | Cu4  | O20  | 1.957(5) |
| Cu2  | O8   | 1.954(4) | Cu4  | O23  | 1.973(4) |
| Cu2  | O11  | 1.983(5) | Cu4  | O23  | 1.969(4) |
| Cu2  | O12  | 2.811(5) | Cu4  | O22  | 2.839(5) |
| Cu2  | O17  | 2.390(4) | Cu4  | O14  | 2.407(5) |

Table S3. Cu–O–Cu bridging angles ( $^{\circ}$ ) of the copper hydroxide chain units A and B in **1**.

| atom | atom | atom | angle      | atom | atom | atom | angle      |
|------|------|------|------------|------|------|------|------------|
| Cu1  | O8   | Cu2  | 101.37(18) | Cu3  | O23  | Cu4  | 100.77(19) |
| Cu1  | O8   | Cu2  | 118.06(18) | Cu3  | O23  | Cu4  | 118.37(18) |
| Cu2  | O8   | Cu2  | 98.58(15)  | Cu4  | O23  | Cu4  | 98.61(15)  |

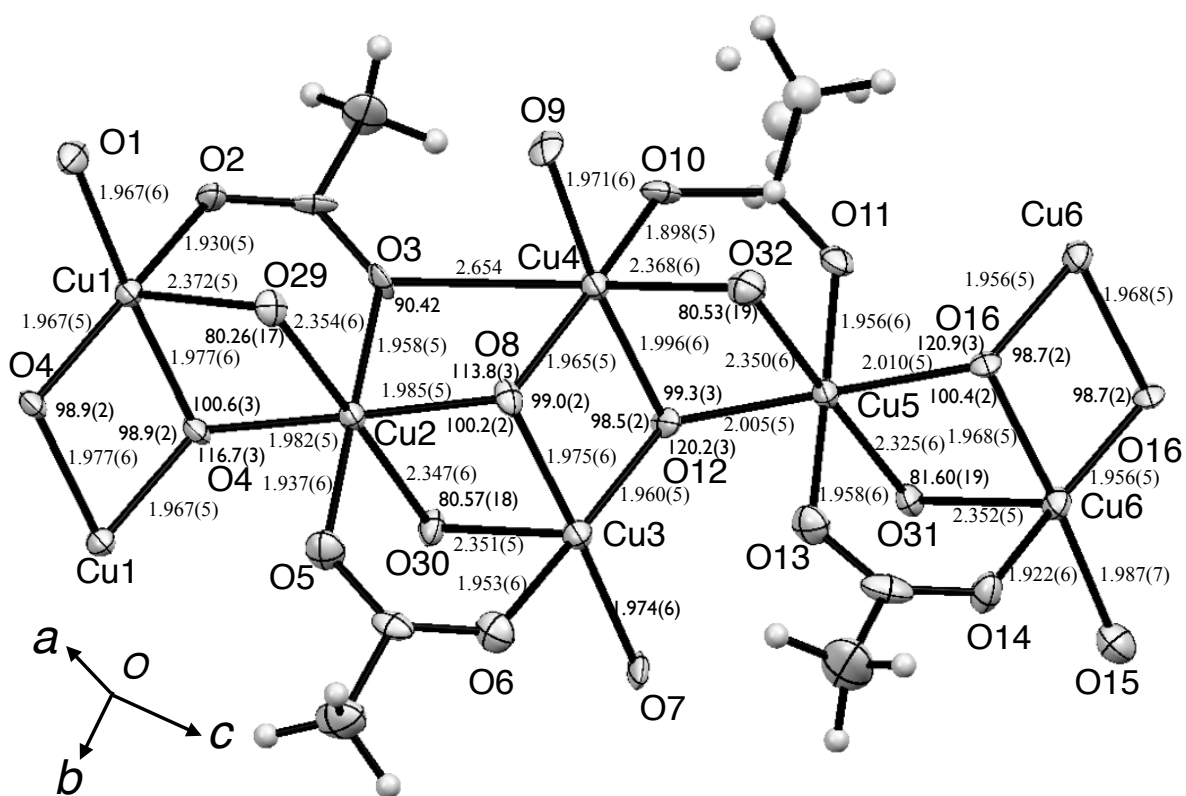

Figure S3. Local structures, main interatomic distances and bond angles in the copper hydroxide chain unit of the  $\beta$  phase. Interatomic distances and bridging angles were described in Times New Roman and Helvetica, respectively. One carboxylate group has a static disorder.

Table S4. Interatomic distances (Å) of the copper hydroxide chain units in the  $\beta$  phase.

| atom | atom | distance | atom | atom | distance |
|------|------|----------|------|------|----------|
| Cu1  | O2   | 1.930(5) | Cu4  | O10  | 1.898(5) |
| Cu1  | O1   | 1.967(6) | Cu4  | O8   | 1.965(5) |
| Cu1  | O4   | 1.967(5) | Cu4  | O9   | 1.971(6) |
| Cu1  | O4   | 1.977(6) | Cu4  | O12  | 1.996(6) |
| Cu1  | O29  | 2.372(5) | Cu4  | O32  | 2.368(6) |
| Cu2  | O5   | 1.937(6) | Cu5  | O11  | 1.956(6) |
| Cu2  | O3   | 1.958(5) | Cu5  | O13  | 1.958(6) |
| Cu2  | O4   | 1.982(5) | Cu5  | O12  | 2.005(5) |
| Cu2  | O8   | 1.985(5) | Cu5  | O16  | 2.010(5) |
| Cu2  | O30  | 2.347(6) | Cu5  | O31  | 2.325(6) |
| Cu2  | O29  | 2.354(6) | Cu5  | O32  | 2.350(6) |
| Cu3  | O6   | 1.953(6) | Cu6  | O14  | 1.922(6) |
| Cu3  | O12  | 1.960(5) | Cu6  | O16  | 1.956(5) |
| Cu3  | O7   | 1.974(6) | Cu6  | O16  | 1.968(5) |
| Cu3  | O8   | 1.975(6) | Cu6  | O15  | 1.987(7) |
| Cu3  | O30  | 2.351(5) | Cu6  | O31  | 2.352(5) |

Table S5. Cu–O–Cu bridging angles ( $^{\circ}$ ) of the copper hydroxide chain units in the  $\beta$  phase.

| atom | atom | atom | angle    | atom | atom | atom | angle     |
|------|------|------|----------|------|------|------|-----------|
| Cu1  | O4   | Cu1  | 98.9(2)  | Cu2  | O29  | Cu1  | 80.26(17) |
| Cu1  | O4   | Cu2  | 116.7(3) | Cu2  | O30  | Cu3  | 80.57(18) |
| Cu1  | O4   | Cu2  | 100.6(3) | Cu5  | O31  | Cu6  | 81.60(19) |
| Cu4  | O8   | Cu3  | 99.0(2)  | Cu5  | O32  | Cu4  | 80.53(19) |
| Cu4  | O8   | Cu2  | 113.8(3) | Cu4  | O12  | Cu5  | 99.3(3)   |
| Cu3  | O8   | Cu2  | 100.2(2) | Cu6  | O16  | Cu6  | 98.7(2)   |
| Cu3  | O12  | Cu4  | 98.5(2)  | Cu6  | O16  | Cu5  | 120.9(3)  |
| Cu3  | O12  | Cu5  | 120.2(3) | Cu6  | O16  | Cu5  | 100.4(2)  |

## 2. Powder X-ray Diffraction Measurements of **1**

Powder X-ray diffraction data of an as-prepared sample were collected with graphite-monochromated Cu-K $\alpha$  ( $\lambda = 1.54056 \text{ \AA}$ ) radiation on a RIGAKU RINT UltimaIII X-ray diffractometer at room temperature.

Table S6. Major peak positions ( $2\theta / ^\circ$ ) of powder X-ray diffraction patterns for **1** at room temperature and calculated from single crystal data at 250 K in **1**.

| <b>1</b> , measured<br>(RT) | <b>1</b> , calculated<br>(250 K) <sup>a</sup> | <b>1</b> , measured<br>(RT) | <b>1</b> , calculated<br>(250 K) <sup>a</sup> |
|-----------------------------|-----------------------------------------------|-----------------------------|-----------------------------------------------|
| 6.540                       | 6.58                                          | 25.820                      | 25.80                                         |
| 8.320 <sup>b</sup>          | —                                             | 26.720                      | 26.82                                         |
| 10.460                      | 10.46                                         | 31.260                      | 31.28                                         |
| 11.281                      | 11.34                                         | 33.179                      | 33.12                                         |
| 13.280                      | 13.32                                         | 34.561                      | 34.68                                         |
| 15.280                      | 15.34                                         | 37.140                      | 37.18                                         |
| 18.180                      | 18.22                                         | 37.839                      | 37.76                                         |
| 19.780                      | 19.84                                         | 40.260                      | 40.28                                         |
| 20.860                      | 20.90                                         | 41.000                      | 40.96                                         |
| 21.840                      | 21.88                                         | 42.100                      | 42.14                                         |
| 22.741                      | 22.80                                         | 42.701                      | 41.78                                         |
| 23.121                      | 23.14                                         | 43.741                      | 43.86                                         |
| 24.040                      | 24.08                                         | 45.222                      | 45.20                                         |
| 24.882                      | 24.86                                         | 47.679                      | 47.74                                         |

<sup>a</sup> Calculated from single crystal data of **1** at 250 K.

<sup>b</sup> This peak did not correspond to **1** or the  $\beta$  phase and attributes to small amount of impurity.



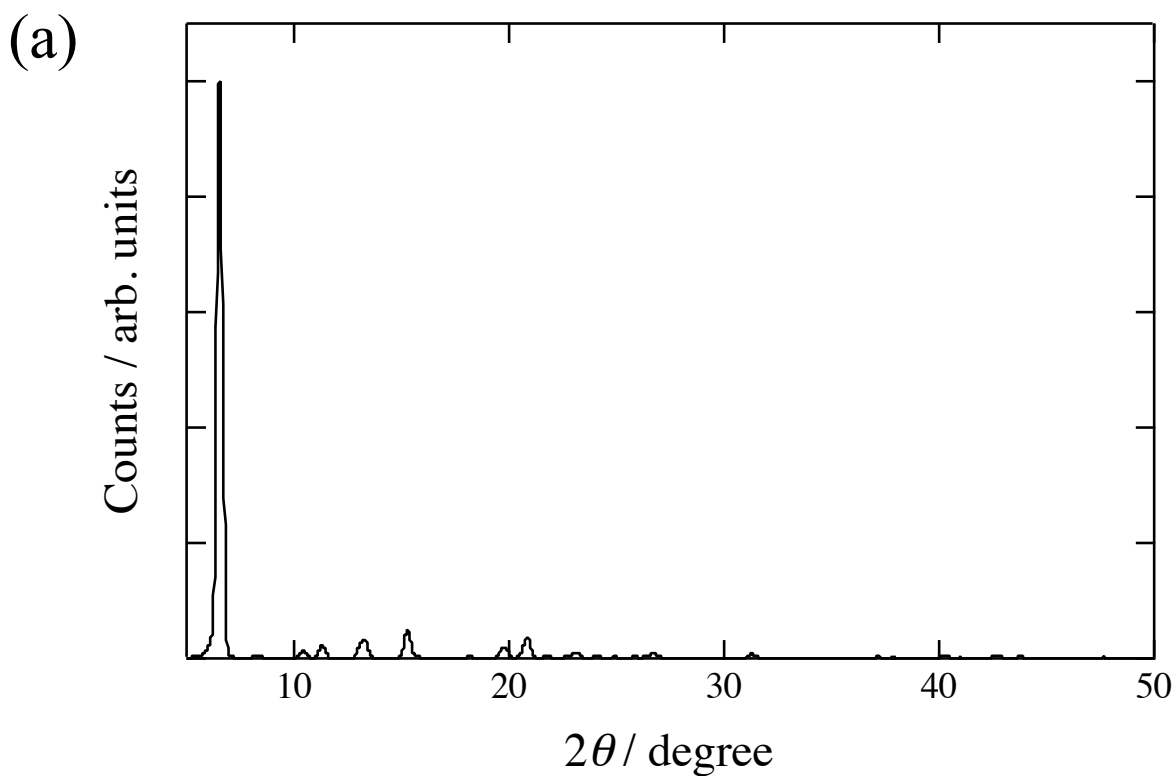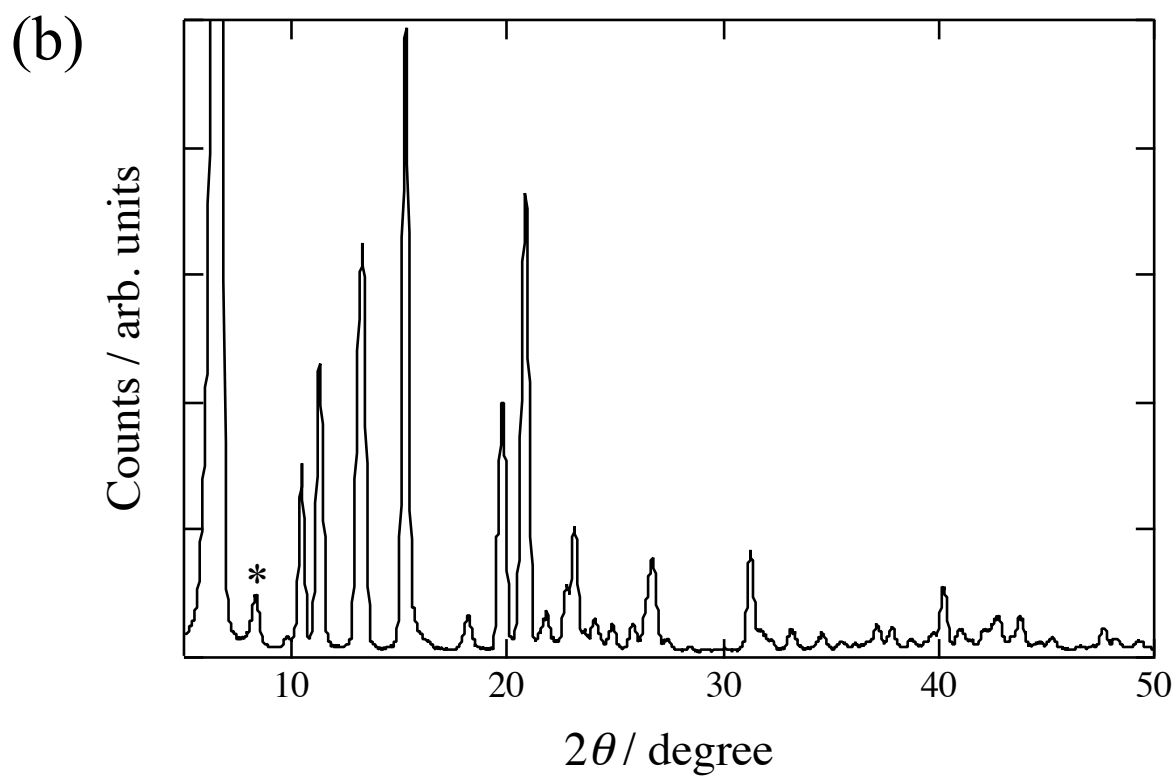

Figure S4. Powder X-ray diffraction patterns of **1** at room temperature (a) and its magnified figure (b). The peak of the mark \* may be originated to impurity.

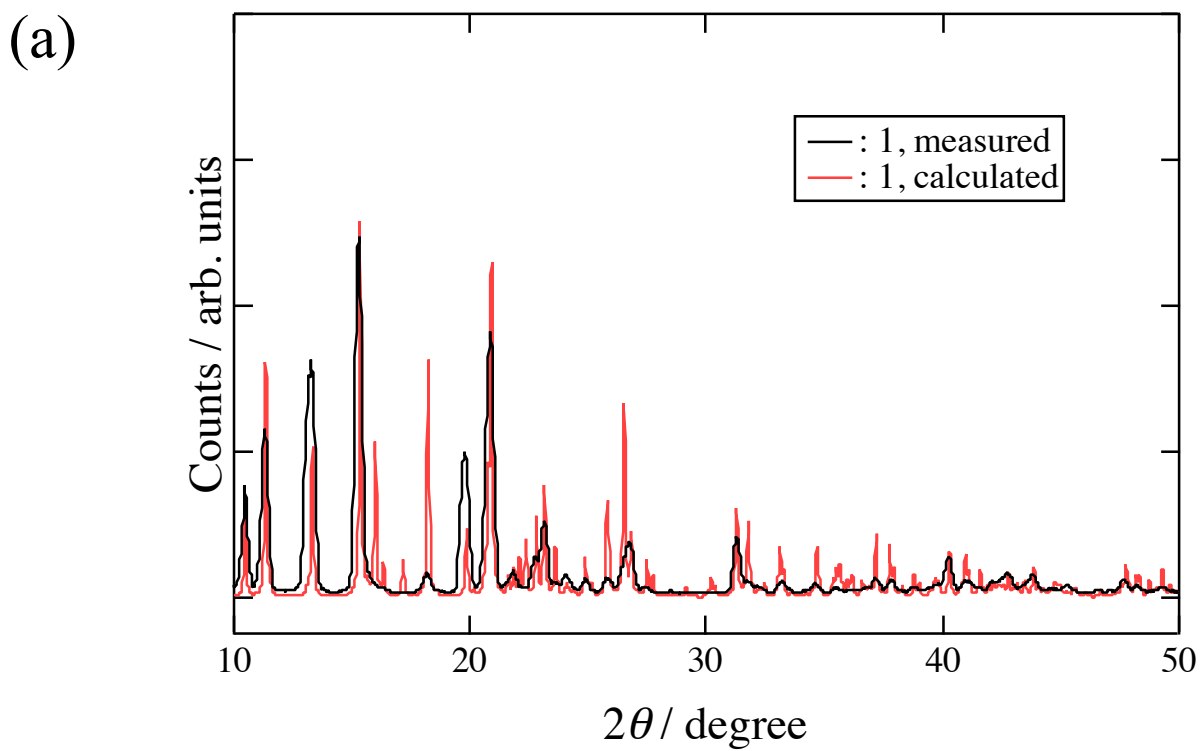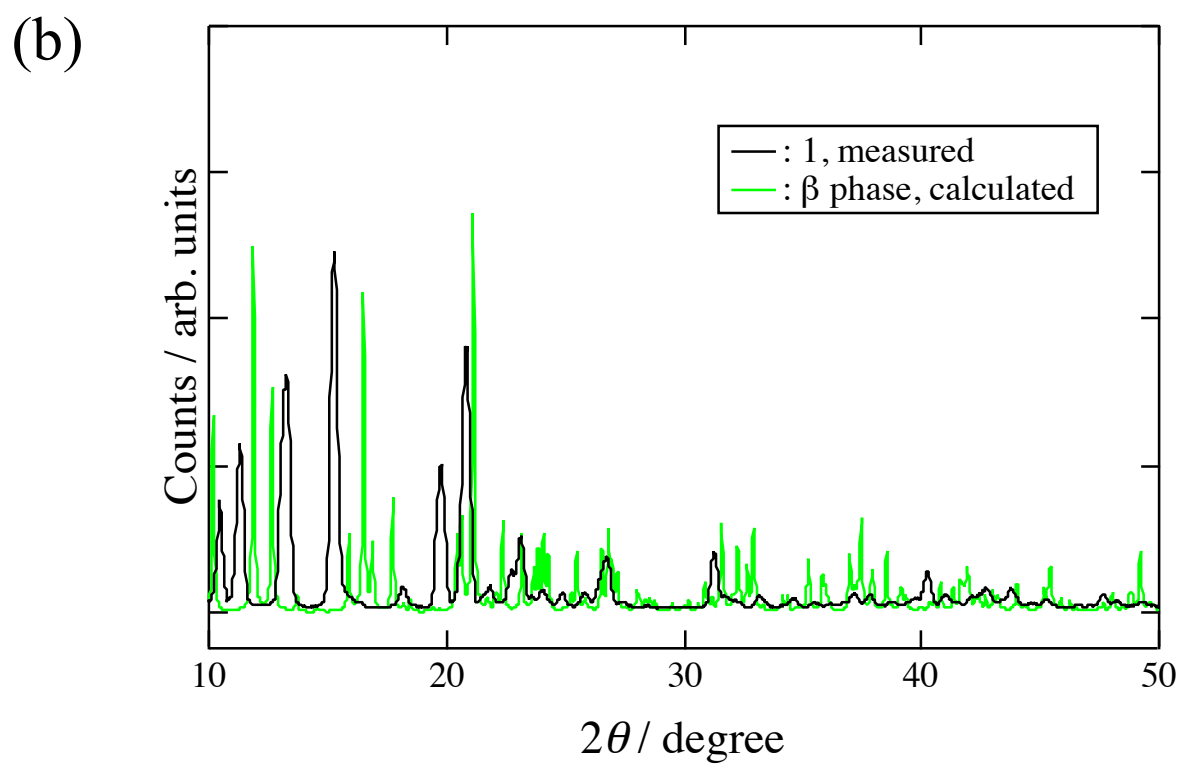

Figure S5. Comparison of powder X-ray diffraction patterns of **1** (a) with single crystals of **1** and (b) with single crystals of the  $\beta$  phase.

### 3. Magnetic Measurements of **1**

Magnetic measurements of **1** were carried out for a microcrystalline sample with random orientation on a SQUID (Quantum Design MPMS XL) magnetometer down to 2 K. Temperature dependence of the dc susceptibility was measured under 500 Oe. The molar unit of the paramagnetic susceptibility  $\chi_p$  was chosen as the quantity per one mole of Cu(II). The experimental raw data were corrected for the diamagnetic contribution,  $-0.0000903 \text{ emu mol}^{-1}$ , which was estimated using Pascal's constants. Field dependence of the magnetization of **1** was carried out at 2 K.

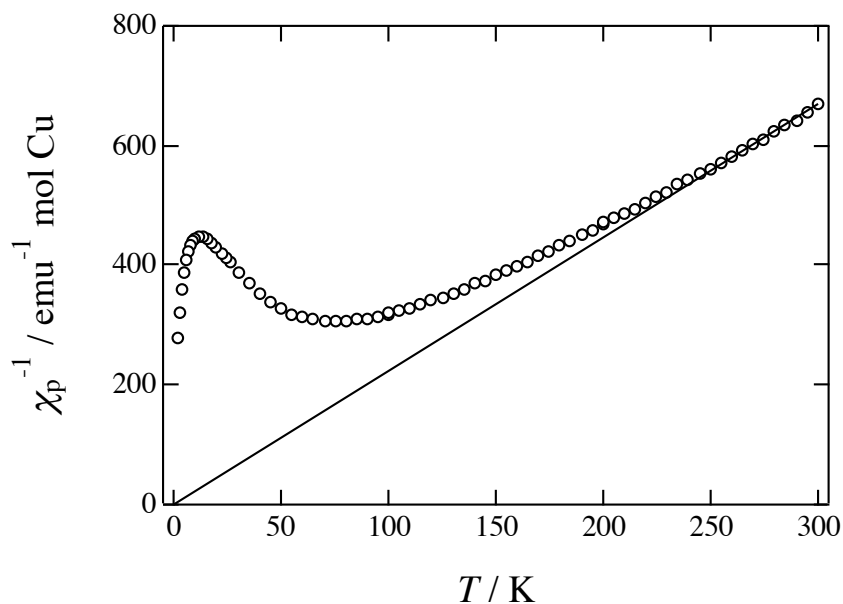

Figure S6. Temperature dependence of  $1/\chi_p$  for **1** under the dc magnetic field of 500 Oe.

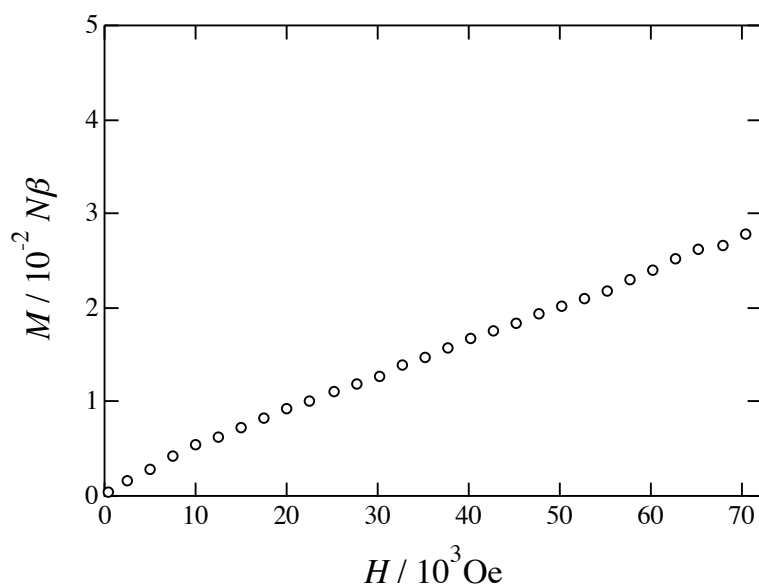

Figure S7. Field dependence of the magnetization for **1** at 2 K.

#### 4. Hamiltonian of a Distorted Diamond Chain Lattice

The Hamiltonian of a distorted diamond chain lattice was defined as follows:<sup>3</sup>

$$H = J_1 \sum_j \left\{ (S_{3j-1} \cdot S_{3j})_{\Delta} + (S_{3j} \cdot S_{3j+1})_{\Delta} \right\} + J_2 \sum_j \left\{ (S_{3j+1} \cdot S_{3j+2})_{\Delta} \right\} \\ + J_3 \sum_j \left\{ (S_{3j-2} \cdot S_{3j})_{\Delta} + (S_{3j} \cdot S_{3j+2})_{\Delta} \right\}$$

where  $(S_m \cdot S_n)_{\Delta} \equiv S_m^x S_n^x + S_m^y S_n^y + \Delta S_m^z S_n^z$ . The parameter  $\Delta$  is called the interaction anisotropy parameter.

## 5. References

1. G. M. Sheldrick, *Acta Crystallogr. A* 1990, **46**, 467.
2. G. M. Sheldrick, Program for the Refinement of Crystal Structures, University of Göttingen, Germany, 1997.
3. K. Okamoto, A. Tokuno and T. Sakai, *J. Mag. Mag. Mater.*, 2007, **310**, e457.
